# Supplementary material
Source: HighWire-hosted journal article supplement (http://cmajopen.ca/highwire/filestream/80886/field_highwire_adjunct_files/2/open-2015-0142-original-submission.pdf)
Supplement: open-2015-0142-original-submission.pdf [file open-2015-0142-original-submission.pdf]

1  
2  
3 Facilitators and barriers to accessing clinical prevention  
4 services for the South Asian population in Surrey, BC: A  
5 qualitative study.  
6  
7

8 Authors: Sanaa Majid, BHSc  
9 MPH Practicum Student, Fraser Health Authority  
10 MPH Candidate, University of Waterloo  
11 400-13450 102<sup>nd</sup> Ave. Surrey, BC, V3T 0H1  
12

13 Rachel Douglas, MPH (corresponding)  
14 Evaluation Specialist, Population Health Observatory, Fraser  
15 Health Authority  
16 400-13450 102<sup>nd</sup> Ave. Surrey, BC, V3T 0H1  
17 [Rachel.douglas@fraserhealth.ca](mailto:Rachel.douglas@fraserhealth.ca) 604-930-5404 x765860  
18  
19

20 Victoria Lee, MD MPH  
21 Chief Medical Health Officer, Fraser Health Authority  
22 400-13450 102<sup>nd</sup> Ave. Surrey, BC, V3T 0H1  
23

24 Elizabeth Stacy, MA  
25 Research Coordinator, eHealth Strategy Office, Faculty of  
26 Medicine, The University of British Columbia  
27 P.A. Woodward Instructional Resources Centre (IRC)  
28 105 - 2194 Health Sciences Mall, Vancouver, BC, V6T 1Z3  
29  
30

31 Arun K Garg, MD PHD  
32 Medical Lead, South Asian Health Institute, Fraser Health  
33 Authority;  
34 Clinical Professor, Department of Pathology and Laboratory  
35 Medicine, Faculty of Medicine, The University of British Columbia  
36 330 E Columbia St., New Westminster, BC, V3L 3W7  
37  
38

39 Kendall Ho, MD  
40 Director, eHealth Strategy Office and Professor, UBC Department  
41 of Emergency Medicine, Faculty of Medicine, The University of  
42 British Columbia  
43 P.A. Woodward Instructional Resources Centre (IRC)  
44 105 - 2194 Health Sciences Mall, Vancouver, BC, V6T 1Z3  
45  
46

47 Version 2.8

48 November 18, 2015

49 Supported by the Surrey Memorial Hospital Foundation

50  
51 Word Count (body): 2557  
52  
53

54  
55 Acknowledgements: The authors would like to acknowledge the  
56 generous support of Dr. Nicole Berry in the development of the  
57 study design and Dr. Laurie Goldsmith in the analysis of results  
58  
59  
60

1  
2  
3  
4  
5  
6  
7  
8  
9  
10  
11  
12  
13  
14  
15  
16  
17  
18  
19  
20  
21  
22  
23  
24  
25  
26  
27  
28  
29  
30  
31  
32  
33  
34  
35  
36  
37  
38  
39  
40  
41  
42  
43  
44  
45  
46  
47  
48  
49  
50  
51  
52  
53  
54  
55  
56  
57  
58  
59  
60

and review of this article. Your expertise and advice were integral to the success of this project. We would also like to acknowledge the 9 volunteers who generously gave their time to support study implementation, without them this project would not have been possible.

Confidential

## Abstract

### Background:

British Columbia falls short in uptake of provincially recommended clinical prevention services, with even lower rates among newcomer populations. This study explored facilitators and barriers to clinical prevention service uptake among South Asians, who represent 31% of the population, in Surrey, BC.

### Methods:

Eight focus groups were conducted with South Asian participants in Punjabi with English interpretation for non-Punjabi speaking participants. All focus groups were audio recorded, and transcripts were analyzed thematically by two independent coders.

### Results:

Facilitators and barriers fell into three broad categories: patient factors; patient-provider relationship factors; and health system factors.

Patient factors include individual characteristics or experiences. Facilitators included: taking ownership over health; health literacy; and respecting provider's advice.

Barriers included: fear of diagnosis, death and/or procedures; low perceived utility/risk; and side effects of procedures.

Provider factors reflected patients' experiences with health care providers, and centred on trust-based patient-provider relationships, strong communication, and spending adequate time with patients during a visit.

Health system factors included structures that influence care. These included facilitators such as processes to ensure prevention services are routinely offered as part of other health or social services, system incentives that encourage "full service" family practice and low/no cost services.

### Interpretation:

Facilitators and barriers identified in each category provide insight into how services can be more acceptable and accessible. The relative emphasis on factors influenced by system level

1  
2  
3  
4  
5  
6  
7  
8  
9  
10  
11  
12  
13  
14  
15  
16  
17  
18  
19  
20  
21  
22  
23  
24  
25  
26  
27  
28  
29  
30  
31  
32  
33  
34  
35  
36  
37  
38  
39  
40  
41  
42  
43  
44  
45  
46  
47  
48  
49  
50  
51  
52  
53  
54  
55  
56  
57  
58  
59  
60

policies supports greater consideration of how universal policies may disproportionately impact some populations and contribute to health inequity.

Abstract Word Count: 243

Confidential

## Introduction

Population health improvement has emerged as a priority within BC's health system and an integrated and systematic provision of clinical prevention services has been identified as a key strategy to achieve this goal. [1-3] Moreover, a cost-effective delivery of priority clinical prevention services has the potential to reduce the burden of disease and the resulting demand for health care. [4-7] In 2009, BC's Clinical Prevention Policy Review Committee (CPPRC) released a "Lifetime Prevention Schedule" [3], which identified priority clinical prevention activities based on clinical effectiveness, population health impact, clinically preventable burden and cost effectiveness. Based on this assessment, the following 10 activities were identified as priorities for adults: smoking cessation; alcohol screening and brief counselling; hypertension and cholesterol screening and treatment; colorectal, breast and cervical cancer screening; and influenza, pneumococcal and tetanus immunizations.

For many of these services, uptake rates in BC lag behind international gold standards [3] and evidence from Canada and the US suggests even lower uptake among ethnic minority groups, including South Asians. [8-10] The South Asian population also has higher risk than the Caucasian population for both diabetes and cardiovascular disease [11-12].

Fraser Health is British Columbia's largest and fastest growing health region and home to over 40% of the province's immigrants

1  
2  
3 and over 80% of government assisted refugees. [13] In this  
4 context, strategies to deliver preventative services that meet  
5 the needs of diverse populations are essential for providing  
6 quality care and contributing to health system sustainability.  
7 Despite the increasing focus and literature on clinical  
8 prevention for South Asians [14-21], there are significant gaps  
9 in understanding barriers to service uptake. This study sought  
10 to understand the barriers and facilitators to clinical  
11 prevention uptake for the South Asian population.  
12  
13  
14  
15  
16  
17  
18  
19  
20

## 21 *Methods*

### 22 • *Setting*

23  
24  
25 Surrey, BC is the Fraser Health region's largest city with more  
26 than 450,000 residents. [22] Visible minorities make up 53% of  
27 the population and 31% of the total population reported South  
28 Asian ancestry. South Asians also represent 15% of the region's  
29 overall population and are its fastest growing segment. In  
30 Surrey, the top five countries of origin for South Asian  
31 immigrants include: India, Pakistan, Sri Lanka, Nepal and  
32 Bangladesh. Punjabi is the most common non-official language  
33 spoken by 24% of the overall population. Other common South  
34 Asian languages included Hindi (7%) and Urdu (1%). [22]  
35  
36  
37  
38  
39  
40  
41  
42  
43  
44  
45  
46

### 47 *Participant Recruitment*

48  
49 Study participants were South Asians over 40 years old from  
50 Surrey, BC. We used multiple recruitment sites and diverse  
51 mechanisms to reach a broad spectrum of the South Asian  
52 population. We drew the study sample from patients and visitors  
53 to the Jim Pattison Outpatient Care and Surgery Centre (JPOCSC),  
54  
55  
56  
57  
58  
59  
60

1  
2  
3 and community settings. At JPOCSC, we used multilingual  
4  
5 volunteers in waiting areas and a database of recent patients  
6  
7 who had consented to be contacted for research to identify  
8  
9 potential participants. In the community we recruited at health  
10  
11 events and via seniors programs and housing, community  
12  
13 organizations, primary care and recreational settings. Word of  
14  
15 mouth among members of the community was also a source of  
16  
17 referrals.  
18

19  
20 We tailored recruitment methods to the needs of each site. In  
21  
22 most locations members of the research team gave prospective  
23  
24 participants a brief verbal and/or written overview of the study  
25  
26 and invited them to provide their contact information if they  
27  
28 were interested in participating. In other locations posters  
29  
30 were used. Research ethics required that individuals have at  
31  
32 least 24 hours to consider their participation before consenting  
33  
34 so volunteers contacted those who expressed interest to complete  
35  
36 the consent process 1-2 weeks after initial contact.  
37

### 38 *Study Type/Design*

39  
40 The Fraser Health Research Ethics Board reviewed and approved  
41  
42 this study. The research team adopted an inductive, qualitative  
43  
44 research approach and data was collected through focus groups.  
45  
46 We organized participants into groups based on gender, as  
47  
48 community partners advised us that gender specific groups would  
49  
50 support more active participation. The study was originally  
51  
52 designed to host separate focus groups for older (65+) and  
53  
54 younger (40-65) participants in order to focus only on topics  
55  
56 that were recommended for the group based on age and gender.  
57  
58  
59  
60

1  
2  
3 However, many focus groups were integrated into ongoing  
4 community programs where it would have been inappropriate to  
5 deny participation by those outside of the age range for the  
6 focus group so the design shifted to respond to the community  
7 context. A maximum of 10 participants were recruited for each  
8 focus group.  
9

10  
11 We obtained background data from the majority of participants  
12 upon their enrollment into the study, using a brief demographic  
13 questionnaire. However, due to logistical considerations, one  
14 site requested that we contact participants to collect  
15 demographic information following the group instead. Background  
16 questions explored: age, gender, languages spoken, length of  
17 time in Canada, native country/region, religious beliefs,  
18 education level, and level of identification with South Asian  
19 culture using an adaptation of the South Asian Identity Scale  
20 [14].  
21

22  
23 We conducted focus groups in person in community settings and at  
24 JPOCSC. All groups were led by a bilingual Punjabi and English  
25 speaking facilitator. We held focus groups in Punjabi and  
26 provided simultaneous whisper translation of the questions and  
27 discussion into English to include non-Punjabi speaking  
28 participants. We recorded both the English and the Punjabi  
29 dialogue. The English version was transcribed for data analysis  
30 and a bilingual member of the research team reviewed the  
31 transcripts comparing them to the Punjabi recording and adding  
32 notes to the transcripts with any dialogue that was missed or  
33 misinterpreted during the interpretation process. Most of these  
34  
35  
36  
37  
38  
39  
40  
41  
42  
43  
44  
45  
46  
47  
48  
49  
50  
51  
52  
53  
54  
55  
56  
57  
58  
59  
60



1  
2  
3 notes were errors of omission and did not substantially change  
4 the meaning of the dialogue but enriched it. Focus groups were  
5 semi-structured based on a focus group guide developed in  
6 collaboration with community partners (see Appendix A). We used  
7 fictitious case scenarios or “vignettes” [23] to encourage in-  
8 depth discussion without having to share personally sensitive  
9 information in a group context. In each vignette, the character  
10 learns about a clinical prevention activity that he or she is  
11 eligible and insured for under BC’s universal Medical Services  
12 Plan, but with which he or she does not follow through. Focus  
13 group participants were then asked about what the character  
14 might be thinking or feeling about the prevention activity and  
15 what might prevent him or her from accessing the service.  
16 Participants were also asked where they might seek information  
17 about the topic and how services could change to improve  
18 accessibility.

19  
20 Each focus group was assigned 3 of the 10 priority clinical  
21 prevention topics based on a purposeful process to ensure  
22 coverage of each relevant topic for each gender. Groups ran for  
23 a total of 90 minutes, with approximately 20 minutes allocated  
24 for each topic along with time for refreshments and an  
25 introduction to the group.

### 26 27 28 *Primary measurements and outcomes*

29  
30 Initial analysis focussed on identifying facilitators and  
31 barriers for accessing clinical prevention services from the  
32 patient perspective. The research team used the study  
33  
34  
35

1  
2  
3 objectives and research questions to develop the initial  
4 codebook for qualitative analysis of the transcribed focus  
5 groups.  
6  
7

8  
9 Two coders (SM & RD) worked independently using QSR NVivo  
10 version 10 software to attach labels to parts of the text that  
11 relate to the themes. They created additional codes and sub-  
12 codes throughout this process and kept a shared log of new codes  
13 and their descriptions. The coders met regularly to review their  
14 understanding of each code, explore how they had been applied,  
15 and resolve any discrepancies in their interpretation. The  
16 results of this initial analysis were shared with the broader  
17 team and the ensuing discussion helped to guide subsequent  
18 coding. The coding team continued with a second level of  
19 analysis to map relationships between the codes and identify any  
20 emerging themes.  
21  
22  
23  
24  
25  
26  
27  
28  
29  
30  
31  
32  
33  
34  
35

### 36 **Results**

37  
38 A total of 81 participants took part in the study; 76 of them  
39 completed demographic interviews; and 62 attended 1 of the 8  
40 focus groups (5 female, 3 male). This sample represented 74% of  
41 our 110 participant target for recruitment. While the study  
42 offered focus group participation in Punjabi, English, Hindi or  
43 Urdu all participants were comfortable participating in either  
44 Punjabi or English so no interpretation into Hindi or Urdu was  
45 conducted. Additional demographic details are summarized in  
46 Table 1.  
47  
48  
49  
50  
51  
52  
53  
54  
55  
56  
57  
58  
59  
60

1  
2  
3 During coding, researchers observed barriers and facilitators  
4 appearing in three different contexts: 1) within the individual  
5 context, based on personal characteristics or experiences; 2)  
6 within the provider context, based on factors related to the  
7 patient-provider interaction; and 3) within the context of the  
8 health care system, based on factors related to how services are  
9 structured or delivered. However, some barriers and  
10 facilitators touched on multiple levels and were coded as such.  
11  
12  
13  
14  
15  
16  
17  
18  
19  
20  
21

### 22 **Individual Factors**

23  
24 When participants spoke about individual level facilitators,  
25 they stressed the importance of taking responsibility for one's  
26 own health by asking for services, advocating for health needs  
27 and keeping notes or records. Participants also identified  
28 knowledge as a key facilitator, including information about  
29 disease risks and the risks and benefits of prevention services.  
30 They recommended outreach education and collaboration with the  
31 South Asian media to increase awareness. Finally, participants  
32 mentioned cultural beliefs that fostered respect for the advice  
33 of the healthcare provider as a facilitator to accessing  
34 services.  
35  
36  
37  
38  
39  
40  
41  
42  
43  
44  
45

46 Participants identified fear as the primary individual barrier  
47 to uptake. This included fear of: diagnosis, death and  
48 procedures as well as fear of the healthcare provider's  
49 recommendations and subsequent impacts on life (e.g., needing to  
50 take time off work or change dietary habits). Moreover, some  
51 participants endorsed a belief that the stress of learning about  
52  
53  
54  
55  
56  
57  
58  
59  
60

1  
2  
3 a diagnosis could actually exacerbate symptoms and make health  
4 worse. A second barrier was perceived low risk of disease or  
5 utility of the intervention (e.g., not experiencing symptoms;  
6 living a healthy lifestyle; don't see the need for the service).  
7 Side effects of clinical prevention activities, real or  
8 perceived, emerged as a third barrier. See Box 1 for a selection  
9 of participant comments within the individual context.  
10  
11  
12  
13  
14  
15  
16  
17  
18  
19

### 20 **Provider Interaction Factors**

21 When participants spoke about interactions with their healthcare  
22 provider they mentioned the following facilitators: a) active  
23 listening, where the participant feels their doctor is listening  
24 to them and acknowledging their concerns; b) trusting  
25 relationships, where the provider and patient have a strong  
26 rapport; and c) an unhurried pace, where the participant feels  
27 their provider gives them space and time to voice their  
28 concerns, takes time to explain procedures or changes, and  
29 allows time for questions.  
30  
31  
32  
33  
34  
35  
36  
37  
38  
39

40 Barriers in this context included: not sharing information  
41 (e.g., not providing advice on relevant prevention activities,  
42 providing medication without counselling); broken trust as a  
43 result of inaction or a missed diagnosis and; rushing/not  
44 listening. See Box 2 for a selection of participant comments  
45 about the provider interaction context.  
46  
47  
48  
49  
50  
51  
52  
53  
54

### 55 **Health System Factors**

56  
57  
58  
59  
60

1  
2  
3 When speaking about health system level facilitators  
4  
5 participants raised: embedded processes, where prevention  
6  
7 services are routinely offered or required as part of other  
8  
9 health or social services (e.g., reminders for mammograms,  
10  
11 medical check-up requirements for a job); availability of  
12  
13 services, including mobile mammograms, the nurse telephone  
14  
15 hotline, flu shots at the pharmacy and; low or no cost of  
16  
17 clinical prevention services.  
18

19  
20 The most commonly mentioned health system barriers were policies  
21  
22 that limit physicians' time with patients and/or limit the  
23  
24 number of issues discussed per visit; conflicting or changing  
25  
26 guidelines about a procedure; and a lack of reminders for  
27  
28 prevention services. See Box 3 for a selection of participant  
29  
30 comments concerning the health system context.  
31

32 While barriers and facilitators were described at all three  
33  
34 levels in our study the most commonly voiced barrier to clinical  
35  
36 prevention uptake, by far, was the lack of effective  
37  
38 communication and trust with primary care providers due to  
39  
40 curtailed consultations.  
41

### 42 43 44 *Interpretation* 45

46 The results of this study are consistent with previous research  
47  
48 on access to health services by South Asians in North America.  
49  
50 This literature highlights the impact of culturally-related [14]  
51  
52 and pragmatic [15] barriers to service uptake such as  
53  
54 transportation and hours of service. It also describes the  
55  
56 central role of cultural and health literacy in preventative  
57  
58  
59  
60

1  
2  
3 service uptake and chronic disease management for South Asians  
4 [24-26] and other immigrant and senior populations [27-28]. All  
5 of these themes also emerged in our study.  
6  
7

8  
9  
10 However, while culturally specific and patient level barriers  
11 were present in our study, the most salient barriers to clinical  
12 prevention access were related to short duration and poor  
13 quality patient-provider interactions. BC primary care  
14 physicians are predominantly remunerated under a "fee for  
15 service" model that has been associated with short appointment  
16 times and office policies limiting the number of issues  
17 addressed per visit [29] and both of these characteristics were  
18 highlighted as key barriers for our study participants. Although  
19 brief, single issue visits can be characterized as a universal  
20 barrier that is well known [30-34] and applies to the entire  
21 population, our study suggests that there is potential for a  
22 greater negative effect on populations who may already have  
23 difficulty accessing care (i.e., immigrants, seniors etc.).  
24 Moreover, the role of physicians in the South Asian population  
25 is very culturally significant and the population places high  
26 value on the "physician directive" (confirmed by author with  
27 cultural knowledge). This means that when there is limited time  
28 during visits for prevention activities, it may have an even  
29 greater impact for the South Asian population as they expect  
30 leadership to come from their physician.  
31  
32  
33  
34  
35  
36  
37  
38  
39  
40  
41  
42  
43  
44  
45  
46  
47  
48  
49  
50  
51

### 52 *Strengths and Limitations*

53  
54  
55 The primary strength of this study was involvement of the  
56 community at multiple stages of project design and  
57  
58  
59  
60

1  
2  
3 implementation. Community-based providers contributed to the  
4 design of data collection tools and assisted with recruitment  
5 and communication strategies. This allowed for a more  
6 culturally appropriate design and broader reach for participant  
7 recruitment. During the data collection phase, community  
8 partners advised on focus group logistics to remove barriers to  
9 participation. During data analysis and interpretation, it was  
10 an asset to have one coder with a South Asian background.  
11 Presenting early results to the broader team for discussion also  
12 ensured the interpretation of the results was culturally  
13 appropriate and resonated with both health authority and  
14 community service provider perspectives. Rigour during data  
15 analysis was also supported by having two coders, thorough  
16 documentation of code definitions and iterative, collaborative  
17 refinements of the coding structure.

18  
19  
20  
21  
22  
23  
24  
25  
26  
27  
28  
29  
30  
31  
32  
33  
34 Limitations include: low representation from South Asian  
35 communities emigrating from outside of India as well as non-  
36 Punjabi speaking participants of Indian origin; loss of  
37 participants due to seasonal travel to India; and an inability  
38 to explore themes based on age due to the change in study  
39 design.

### 40 41 42 43 44 45 46 47 *Conclusion*

48  
49 Results of this study suggest recommendations at multiple  
50 levels. First, to address individual factors, develop outreach  
51 education and services for the South Asian community by  
52 partnering with the local South Asian media and bringing  
53 educators to community gathering spaces (e.g., faith-based and  
54  
55  
56  
57  
58  
59  
60

1  
2  
3 community centres) such as the Inter-Cultural Online health  
4  
5 Network program in BC. [35] This will support the community by  
6  
7 bringing services and linguistically appropriate information to  
8  
9 them. Second, within the context of the patient-provider  
10  
11 interaction, this study lends support to initiatives that  
12  
13 promote physician attachment such as BC's *A GP for Me* [36] but  
14  
15 suggests that models of attachment should include and measure  
16  
17 factors like communication and trust between patients and  
18  
19 providers.  
20  
21

22  
23 Finally, within the context of the health system, policies and  
24  
25 remuneration methods that facilitate "full-service family  
26  
27 practice" [37-38] and enable embedded processes and reminders  
28  
29 are recommended.  
30

31  
32 Implementation research based on the above recommendations is  
33  
34 needed to test the impact that suggested changes have on  
35  
36 clinical prevention uptake and population health outcomes.  
37

38  
39 Further research into the interaction between culturally  
40  
41 specific barriers and the overarching health system factors that  
42  
43 exacerbate them would also support more accessible and relevant  
44  
45 provision of clinical prevention services to multicultural  
46  
47 communities.  
48  
49  
50  
51

52 2557 Words  
53  
54  
55  
56  
57  
58  
59  
60



## REFERENCES

1. Kendall, P.R.W. (2010). Investing in Prevention: Improving Health and Creating Sustainability. Available online at: [http://www.health.gov.bc.ca/library/publications/year/2010/Investing\\_in\\_prevention\\_improving\\_health\\_and\\_creating\\_sustainability.pdf](http://www.health.gov.bc.ca/library/publications/year/2010/Investing_in_prevention_improving_health_and_creating_sustainability.pdf)
2. British Columbia Medical Association. (2010). Partners in Prevention: Implementing a Lifetime Prevention Plan. Available online at: [https://www.doctorsofbc.ca/sites/default/files/prevention\\_jun2010.pdf](https://www.doctorsofbc.ca/sites/default/files/prevention_jun2010.pdf)
3. Clinical Prevention Policy Committee (2009). A Lifetime of Prevention: A Report of the Clinical Prevention Policy Review Committee. Available online at: [http://www.health.gov.bc.ca/library/publications/year/2009/CLPPR\\_Lifetime\\_of\\_Prevention\\_Report.pdf](http://www.health.gov.bc.ca/library/publications/year/2009/CLPPR_Lifetime_of_Prevention_Report.pdf)
4. Milstein B., Homer J., Briss P., Burton D., Pechacek. Why behavioral and environmental interventions are needed to improve health at lower cost. *Health Affairs*. 2011;30(5):823.
5. Graves N., McKinnon L., Reeves M., Gordon L., Eakins E. Cost-effectiveness analyses and modeling the lifetime cost and benefits of health behaviour interventions. *Chronic Illness*. 2006;2(97"107).
6. Gaziano T., Gauden G., Reddy K. Scaling up interventions for chronic disease prevention: The evidence. *Lancet*. 2007;370:1939–1945.

- 1  
2  
3 7. Rozario P., Kidahashi M., DeRienzi D. Selection,  
4 optimization, and compensation: Strategies to Maintain,  
5 maximize, and generate resources later in life in the face  
6 of chronic illnesses. Journal of Gerontological Social Work.  
7 2011;54:224-239.  
8
- 9  
10  
11 8. Hanson K., Montgomery P., Bakker D., Conlon M. (2009).  
12 Factors influencing mammography participation in Canada: an  
13 integrative review of the literature. Current Oncology.  
14 2009;16(5).  
15
- 16  
17  
18 9. Lu M., Moritz S., Lorenzette D., Sykes L., Straus S., Quan  
19 H. A systematic review of interventions to increase breast  
20 and cervical cancer screening uptake among Asian women. BMC  
21 Public Health [Internet]. 2012 [cited 5 July 2015];12(413).  
22 Available from: [http://www.biomedcentral.com/1471-](http://www.biomedcentral.com/1471-2458/12/413)  
23 [2458/12/413](http://www.biomedcentral.com/1471-2458/12/413)  
24
- 25  
26  
27 10. Menon U., Szalacha L., Prabhughate A. Breast and Cervical  
28 Cancer Screening Among South Asian Immigrants in the United  
29 States. Cancer Nursing. 2012;35(4).  
30
- 31  
32  
33 11. Gupta M., Singh N., Verma S. South Asians and  
34 Cardiovascular Risk What Clinicians Should Know.  
35 Circulation. 2006;113:924-929.  
36
- 37  
38  
39 12. Leung G., Stanner S. Diets of minority ethnic groups in the  
40 UK: influence on chronic disease risk and implications for  
41 prevention. Nutrition Bulletin. 2011;36:161-198.  
42
- 43  
44  
45 13. Fraser Health Authority (2012). Health Profile 2012: A look  
46 at the health of Fraser Health residents. Available online  
47 at: [http://www.fraserhealth.ca/media/Health\\_Profile\\_2012.pdf](http://www.fraserhealth.ca/media/Health_Profile_2012.pdf)  
48  
49  
50  
51  
52  
53  
54  
55  
56  
57  
58  
59  
60

- 1  
2  
3  
4  
5  
6  
7  
8  
9  
10  
11  
12  
13  
14  
15  
16  
17  
18  
19  
20  
21  
22  
23  
24  
25  
26  
27  
28  
29  
30  
31  
32  
33  
34  
35  
36  
37  
38  
39  
40  
41  
42  
43  
44  
45  
46  
47  
48  
49  
50  
51  
52  
53  
54  
55  
56  
57  
58  
59  
60
14. Surood S., Lai D. Impact of Culture on Use of Western Health Services by Older South Asian Canadians. *Canadian Journal of Public Health*. 2010;101(2):176-180.
  15. Jones C., Nanji A., Mawani S., Davachi S., Ross L., Vollman A. et al. Feasibility of community-based screening for cardiovascular disease risk in an ethnic community: The South Asian Cardiovascular Health Assessment and Management Program (SA-CHAMP). *BMC Public Health*. 2013;13:160.
  16. Ahmad, F., Cameron, J.I. & Stewart, D E. (2005). A tailored intervention to promote breast cancer screening among South Asian immigrant women. *Social science & medicine*; 60(3): 575-586.
  17. Bharmal, N & Chaudhry, S. (2012). Preventive health services delivery to South Asians in the United States. *Journal of Immigrant And Minority Health / Center For Minority Public Health*. 14(5): 797-802.
  18. Grewal, S., Bottorf, J.L. & Balneaves, L.G. (2004). Pap Test Screening Clinic in a South Asian Community of Vancouver, British Columbia: Challenges to Maintaining Utilization. *Public Health Nursing*, 21(5).
  19. Gupta, A; Kumar, A; Stewart, D E. (2002). Cervical cancer screening among South Asian women in Canada: the role of education and acculturation. *Health care for women international*. 23(2): 123-134.
  20. Lofters, A.K., Moinuddin, R., Hwang, S.W. & Glazier, R.H. (2011) Predictors of low cervical cancer screening among immigrant women in Ontario, Canada. *BMC Women's Health* 2011,

1  
2  
3 11:20 Available at: <http://www.biomedcentral.com/1472-6874/11/20>  
4  
5  
6

- 7 21. Redwood-Campbell, L., Fowler, N., Laryea, S., Howard, M. &  
8 Kaczorowski, J. (2011) 'Before You Teach Me, I Cannot Know':  
9 Immigrant Women's Barriers and Enablers With Regard to  
10 Cervical Cancer Screening Among Different Ethnolinguistic  
11 Groups in Canada. *Canadian Journal of Public Health*,  
12 102(3):230-34.  
13  
14  
15  
16  
17  
18  
19  
20 22. Statistics Canada. 2013. Surrey, CY, British Columbia (Code  
21 5915004) (table). National Household Survey (NHS) Profile.  
22 2011 National Household Survey. Statistics Canada  
23  
24  
25  
26  
27  
28  
29 Catalogue no. 99-004-XWE. Ottawa. Released September 11, 2013.  
30  
31  
32 [http://www12.statcan.gc.ca/nhs-enm/2011/dp-  
34 pd/prof/index.cfm?Lang=E](http://www12.statcan.gc.ca/nhs-enm/2011/dp-<br/>33 pd/prof/index.cfm?Lang=E) (accessed September 4, 2015).  
35  
36 23. Gourlay, A., Mshana, G., Birthistle, I., Bulugu, G., Zaba,  
37 B. & Urassa, M. (2014). Using vignettes in qualitative  
38 research to explore barriers and facilitating factors to the  
39 uptake of prevention of mother-to-child transmission  
40 services in rural Tanzania: a critical analysis. *BMC Medical  
41 Research Methodology* 2014, 14:21.  
42  
43  
44  
45  
46  
47  
48 24. Natasha Fatima Jafri. The role of culture and health  
49 literacy in cancer screening practices among young, middle  
50 to upper middle-class Pakistani-American women. US: ProQuest  
51 Information & Learning; 2012.  
52  
53  
54  
55  
56  
57  
58  
59  
60

- 1  
2  
3 25. Patel N, Stone MA, McDonough C, Davies MJ, Khunti K,  
4 Eborall H. Concerns and perceptions about necessity in  
5 relation to insulin therapy in an ethnically diverse UK  
6 population with Type 2 diabetes: a qualitative study  
7 focusing mainly on people of South Asian origin. Diabetic  
8 Med 2015 05;32(5):635-644.  
9  
10  
11  
12  
13  
14  
15  
16 26. Vida Estacio E, McKinley RK, Saïdy-Khan S, Karic T, Clark  
17 L, Kurth J. Health literacy: why it matters to South Asian  
18 men with diabetes. Prim Health Care Res Dev 2015  
19 04;16(2):214-218.  
20  
21  
22  
23  
24  
25 27. (Zou P, Parry M. Strategies for health education in North  
26 American immigrant populations. Int Nurs Rev 2012  
27 12;59(4):482-488 7p.  
28  
29  
30  
31 28. Kobayashi LC, Wardle J, von Wagner C. Limited health  
32 literacy is a barrier to colorectal cancer screening in  
33 England: evidence from the English Longitudinal Study of  
34 Ageing. Prev Med 2014 04;61:100-105.  
35  
36  
37  
38  
39 29. Leger, P.T. (2011). Physician payment mechanisms: An  
40 overview of policy options for Canada: Canadian Health  
41 Services Research Foundation. Available online at:  
42 [http://www.cfhi-fcass.ca/sf-docs/default-source/hospital-](http://www.cfhi-fcass.ca/sf-docs/default-source/hospital-funding-docs/CHSRF-LegerPhysicianRenumerationENG.pdf?sfvrsn=0)  
43 [funding-docs/CHSRF-](http://www.cfhi-fcass.ca/sf-docs/default-source/hospital-funding-docs/CHSRF-LegerPhysicianRenumerationENG.pdf?sfvrsn=0)  
44 [LegerPhysicianRenumerationENG.pdf?sfvrsn=0](http://www.cfhi-fcass.ca/sf-docs/default-source/hospital-funding-docs/CHSRF-LegerPhysicianRenumerationENG.pdf?sfvrsn=0)  
45  
46  
47  
48  
49  
50  
51  
52 30. Ayres CG, Griffith HM. Perceived barriers to and  
53 facilitators of the implementation of priority clinical  
54  
55  
56  
57  
58  
59  
60

1  
2  
3 preventive services guidelines. Am J Manag Care 2007  
4  
5 03;13(3):150-155.  
6  
7

8 31. Hudon E, Beaulieu M, Roberge D. Integration of the  
9  
10 recommendations of the Canadian Task Force on Preventive  
11  
12 Health Care: obstacles perceived by a group of family  
13  
14 physicians. Fam Pract 2004 02;21(1):11-17.  
15  
16

17 32. Mirand AL, Beehler GP, Kuo CL, Mahoney MC. Explaining the  
18  
19 de-prioritization of primary prevention: physicians'  
20  
21 perceptions of their role in the delivery of primary care.  
22  
23 BMC Public Health 2003 05/02;3:15-15.  
24  
25

26 33. Rubio-Valera M, Pons-Vigués M, Martínez-Andrés M, Moreno-  
27  
28 Peral P, Berenguera A, Fernández A. Barriers and  
29  
30 facilitators for the implementation of primary prevention  
31  
32 and health promotion activities in primary care: a synthesis  
33  
34 through meta-ethnography. PLoS One 2014 02/28;9(2):e89554-  
35  
36 e89554.  
37  
38

39 34. Yarnall KSH, Pollak KI, Østbye T, Krause KM, Michener JL.  
40  
41 Primary care: is there enough time for prevention? Am J  
42  
43 Public Health 2003 04;93(4):635-641.  
44  
45

46 35. Zibrik L, Khan S, Novak Lauscher H, Cheema G, Ho B, Bains  
47  
48 J, Harper C & Ho K. iCON: Supporting Chinese and South Asian  
49  
50 BC citizens for optimal self-management. A community-driven  
51  
52 health promotion initiative to improve chronic disease self-  
53  
54 management. BCMJ. 2015 July/August; 57(6):244-245.  
55  
56  
57  
58  
59  
60

- 1  
2  
3 36. Doctors of BC, BC Ministry of Health & General Practice  
4 Services Committee [Internet] Victoria: A GP for Me; 2013.  
5  
6 [cited 2015 August 14]. Available from:  
7  
8 <http://agpforme.ca/for-patients>  
9  
10  
11 37. Cavers W.J.R., Tregillis, V.H.F, Micco A. & Hollander, M.J.  
12 (2010). Transforming family practice in British Columbia:  
13 The General Practice Services Committee. CFP. 2010 December;  
14 56(12): 1318-1321. Available from:  
15  
16 <http://www.cfp.ca/content/56/12/1318.full>  
17  
18  
19  
20  
21 38. Lavergne, M.R., Peterson, S., McKendry, R., Sivananthan, S.  
22 & McGrail, K. (2014). Full-Service Family Practice in  
23 British Columbia: Policy Interventions and Trends in  
24 Practice, 1991-2010. Healthcare Policy. May 2014; 9(4):32-  
25  
26  
27  
28  
29  
30 47. Available from: <http://www.longwoods.com/content/23>  
31  
32  
33  
34  
35  
36  
37  
38  
39  
40  
41  
42  
43  
44  
45  
46  
47  
48  
49  
50  
51  
52  
53  
54  
55  
56  
57  
58  
59  
60

Tables and Boxes

Table 1: Demographic Characteristics of Focus Group Participants

| Gender               | Age                                         | Language(s) Spoken                                        | Country of Birth                  | Years in Canada                                                                                     | Religious Affiliation                   | Highest Level of Education                                                                                                                             | Annual Household Income     | South Asian Identity Scale                                         |
|----------------------|---------------------------------------------|-----------------------------------------------------------|-----------------------------------|-----------------------------------------------------------------------------------------------------|-----------------------------------------|--------------------------------------------------------------------------------------------------------------------------------------------------------|-----------------------------|--------------------------------------------------------------------|
| N=62                 | N=58                                        | N=58                                                      | N=58                              | N=58                                                                                                | N=57                                    | N=57                                                                                                                                                   | N=26                        | N=58                                                               |
| Male=26<br>Female=36 | Mean=66.07<br>Min=40<br>Max=87<br>Median=68 | Punjabi=52<br>English=32<br>Hindi=24<br>Urdu=9<br>Other=3 | India=49<br>Pakistan=6<br>Other=3 | Mean=19.31<br>Min=1<br>Max=65<br>Overall<br>Median=18<br>Median by<br>Focus<br>Group=4.5<br>to 32.5 | Sikhism=43<br>Other=8<br>None=6<br>NR=1 | No Formal<br>Education=8<br>Elementary<br>School=22<br>High School or<br>other Diploma/<br>Certificate=9<br>University<br>Degree or<br>more=18<br>NR=1 | <40k=21<br>>=40k=5<br>NR=32 | Mean # of<br>endorsed<br>items=9.21<br>Min=7<br>Max=10<br>Median=9 |



## Box 1: Individual Factors

**Taking Responsibility for Health** *"But if you know that this is the test you need, then you can go and pressure the doctor. "This is the test I need. This is my right""* Female Focus Group Participant

**Knowledge** *"Unless he doesn't know about his benefits or non-benefits, he won't accept it. Our people who come from India are new immigrants, they never used to bother. They would think I'm fine, I don't need this."* Male Focus Group Participant

*"And examples. When somebody does it he was fine, and somebody didn't do it, what are the losses he had. If you give an example then it's more beneficial."* Male Focus Group Participant

**Fear** *"So many of my friends won't get tests done because they think they'll be taken to the hospital Some people live so many years without knowing about their illness and they are fine. As soon as they find out about it they begin to panic."* Female Focus Group Participant

*"... some people think that if we go for the test, and we may get cancer."* Female Focus group Participant

*"He comes from Asia. ... We eat a lot of clarified butter, sweets, that's all fat. If he has knowledge - these are the benefits, these are the risks of taking, then he thinks he'll have to stop it, and then I don't know, he's scared that doctor would say - like, if it's there - then my sweets and everything will be stopped."* Male Focus Group Participant

**Low utility/risk** *"Like, maybe I don't need one [the pneumococcal vaccine]. In India nobody is bothered about pneumonia. Older people, they don't give much importance to this."* Male Focus Group participant

*"There are so many injections like flu and for other things and so if you are healthy, then you don't care. "I don't need those injections." And sometimes there is information like those companies who make the medicine, they are ruining the economy"* Male Focus Group participant

## Box 2: Provider Interaction Factors

**Trusting relationship** *"If the doctor establishes a good relationship with the patient and encourages him, then it's better for the patient."* Male Focus Group Participant

**Unhurried pace** *"But now my doctor, he is really good. I've had the same doctor for the last seven, eight years and he's really good. He's a good doctor. I'm happy with the doctor now. So if I have any other problems, they should listen to each and every problem. Whatever problem you have, the doctor should listen to you."* Female Focus Group Participant

**Broken trust** *"If you will tell the doctor to check, only then they will check, otherwise they don't. The family doctor should check in routine the blood pressure, blood sugar. But they don't actually check the patient. They just prescribe the medicine, and they just ask verbally and write down the medicine and send the patient home."* Female Focus Group Participant

*"I had cancer in the jaw. I never had any pain in my tooth but I had pain in the jaw and went to see the doctor. I had swelling. He took about two wisdom teeth right away. He took \$250 from me, and then after some time he took out another wisdom tooth. But after that, whenever I used to go to visit him, he would say, "You are fine, you are fine. You're just fine." He just kept on telling me that you don't have to worry about this, just kept telling me that I have infection."* Female Focus Group Participant

**Rushing/Not listening** *"The doctor always will not talk to me, and then she will just write down the medicine for me. They don't have time to discuss with the patient. I show the list of my questions to the doctor and the doctor just gives me the medicine ... she didn't have time to discuss or ask about that. "* Female Focus Group Participant

*"In India when we go to the doctor, they attend them properly. They listen to the patient in detail, but here they don't. They just write down the medicine. Send the patients home. Whenever I went to the clinic, doctor has never checked my diabetes sugar level. I just test myself. They don't. The family doctor does not do that. He should do, it's his duty, but he does not listen. So what is the use of the family doctor?"* Female Focus Group Participant

## Box 3: Health System Factors

**Embedded processes** "Every driver will go do the medical test...he will have to go to this one [to maintain his class 4 driver's license]" Male Focus Group Participant

**Availability of services** "At the Indo-Canadian senior centre, the nurse used to come and then they came to know about blood pressure. They should be in that kind of facility and when seniors can go and check their blood pressure, they can get all the information." Female Focus Group Participant

**System encourages short visit duration** "But the doctor should also take care of the patients. There should be more clinics, and they should listen to the patients. The doctor should give sufficient time to each and every patient. The family doctor does not have this much of time to attend sufficient time." Female Focus Group Participant  
"If I'm talking about stomach illnesses, flu, then he said, "No, you come tomorrow. Come tomorrow, the day after too." They don't want to listen to the other things, and they'll write down afterwards they just talked about one thing. One to two more topics, nothing more than... That time my interest to get some knowledge will go away." Male Focus Group Participant

**Lack of Reminders** "You are advising us that after 50, we should go for the colon screening test. Why the doctors are not referring our cases to the specialist for all these tests? It's the doctor's duty. If you say that after 50 years of age every lady should go for colon test, so why the doctors are not ...referring their cases? Female Focus Group Participant

## Appendix A: Data Collection Instruments

Health is the Key to Happiness - Background interview

Participant Number: \_\_\_\_\_

*Introduction:*

We would like to ask you some questions about yourself and your background. Your answers to these questions are confidential and will only be used for this research project.

- 1) What is your gender:            Male            Female  
                                          Other: Specify \_\_\_\_\_
- 2) How old are you?            \_\_\_\_\_
- 3) What languages do you speak?  
                                          \_\_\_\_\_
- 4) Would you prefer to attend a focus group in English or Punjabi? \_\_\_\_\_
- 5) Where were you born?            Country: \_\_\_\_\_  
                                          Province/State: \_\_\_\_\_
- 6) How long have you lived in Canada? Number of Years:  
                                          \_\_\_\_\_
- 7) What countries or regions do you consider your ancestral home? \_\_\_\_\_
- 8) Do you consider yourself as belonging to any particular religion or denomination?
- Yes            No
- If yes, which one? \_\_\_\_\_
- 9) What is the highest degree, certificate or diploma that you have completed?
- No formal education
-

Grade 6 (Elementary School)

- Grade 12 (High School)
- Certificate or diploma (non-university)
- University Bachelor's degree
- University degree or certificate above bachelor's degree (e.g. Masters or Doctoral Level)

10) How many people live in your household?

\_\_\_\_\_

11) What is your best estimate of the total household income received by all household members, from all sources, before taxes and deductions, in the past 12 months?

- Less than \$40,000
- \$40,000 or more but less than \$80,000
- \$80,000 or more but less than \$100,000
- \$100,000 or more but less than \$150,000
- \$150,000 and over

#### South Asian Ethnic Identity

Do you:

1. Celebrate national holidays, cultural or religious festivals from your South Asian heritage?

2.  
Always Often Sometimes Rarely Never

3. Go to visit your ancestral home?

Yes No

4. Read any South Asian newspapers, magazines, periodicals or websites?

Yes No

1  
2  
3  
4  
5  
6  
7  
8  
9  
10  
11  
12  
13  
14  
15  
16  
17  
18  
19  
20  
21  
22  
23  
24  
25  
26  
27  
28  
29  
30  
31  
32  
33  
34  
35  
36  
37  
38  
39  
40  
41  
42  
43  
44  
45  
46  
47  
48  
49  
50  
51  
52  
53  
54  
55  
56  
57  
58  
59  
60

5. Teach your children or grandchildren to read and write in a South Asian language?  
Yes      No
6. Attend cultural and social functions organized by your South Asian community?  
Yes      No
7. Eat any food that is associated with South Asian religious holidays or special events?  
Yes      No
8. Dress in traditional South Asian dress like a Shalwar-Kurta or Saree?  
Yes      No
9. Listen to radio broadcasts, watch television or go to films in a South Asian language?  
Yes      No
10. Keep in touch with South Asian relatives and friends who live in your ancestral home or other countries?  
Yes      No
11. Speak a South Asian language at home?  
Yes      No

Confidential

# Closing the Gap

## Focus Group Moderator's Guide

### *Population and Public Health*

August 20, 2014

Abridged for dissemination October 14, 2015 (please contact corresponding author to request full version)

Confidential

1  
2  
3  
4  
5  
6  
7  
8  
9  
10  
11  
12  
13  
14  
15  
16  
17  
18  
19  
20  
21  
22  
23  
24  
25  
26  
27  
28  
29  
30  
31  
32  
33  
34  
35  
36  
37  
38  
39  
40  
41  
42  
43  
44  
45  
46  
47  
48  
49  
50  
51  
52  
53  
54  
55  
56  
57  
58  
59  
60

1  
2  
3  
4  
5  
6  
7  
8  
9  
10  
11  
12  
13  
14  
15  
16  
17  
18  
19  
20  
21  
22  
23  
24  
25  
26  
27  
28  
29  
30  
31  
32  
33  
34  
35  
36  
37  
38  
39  
40  
41  
42  
43  
44  
45  
46  
47  
48  
49  
50  
51  
52  
53  
54  
55  
56  
57  
58  
59  
60

**Acknowledgements**

This toolkit utilizes resources and information from the following sources:

**OMNI Institute**

[www.omni.org](http://www.omni.org)

Confidential



## Introduction

### Purpose

This study aims to gather unique information that will contribute to the body of knowledge on developing culturally appropriate strategies to increase access to preventative care and reduce disparities in health outcomes for the South Asian population. While the scope of this project is small the project will provide foundational data for further inquiry into an identified gap in the literature. The intention is to use the results of this study to develop a proposal for a larger implementation research project to address gaps in clinical prevention uptake; add significantly to the literature; and inform the design of clinical prevention services.

The objectives of this study are as follows:

- 1) To explore participants' attitudes towards each of the top 10 clinical prevention activities.
- 2) To identify common barriers to accessing clinical prevention services and ways that the participants are able to overcome them.
- 3) To characterize participants' preferences for accessing clinical prevention services and information, including preferences for e-health tools to support prevention.
- 4) To describe how various characteristics or perspectives may influence preferences about accessing clinical prevention information and services.

### Target Audience

Participants will be drawn from the English or Punjabi speaking 40+ year old South Asian population in Surrey, BC. The participants for each focus group will vary by topic area based on the clinical guidelines. For example, the Pneumococcal Vaccine will only be discussed with the 65+ year old age group as BC guidelines only recommend this vaccine for the general population over 65. In order to facilitate discussion, participants will be recruited into groups that are as homogeneous as possible in terms of gender and age. The groups that discuss mammograms and Pap Tests will only be open to women.

### Additional Directions

Each focus group will run for 2 hours with 1 ½ hours dedicated to the group discussion of 2 or 3 clinical prevention topics. The remaining half hour will be for the group to gather, help themselves to some food and get to know one another and the facilitators through an ice breaker exercise.

- Each focus group will have a moderator and a co-facilitator. The role of the moderator is to facilitate the discussion (but not lead it). The role of the co-facilitator will be to ensure that the process pieces of the focus group are working. This can include making sure that recording and any interpretation are running smoothly, keeping an eye on the time, monitoring the group's dynamics to make sure that everyone feels supported to contribute to the discussion, managing any disruptions etc. The co-facilitator will also take notes on any non-verbal communications to supplement the audio transcript.
- Allow about 20 minutes for each clinical prevention topic. Announce to participants when both 5 minutes and 10 minutes remain so that they are aware of the time left to contribute their thoughts.
- Use your judgment to determine if the topic is providing valuable data and need to adjust the amount of time spent on that particular topic.
- Encourage each participant to speak equally. Call on participants that are not contributing as much to the discussion.
- Suggest to participants to speak up when they have difference of opinion, rather than agreeing with everyone else's opinions and values.
- Provide paper and pen to participants for the icebreaker and for additional notes they may want to take throughout the focus group.

## Moderator Guide and Script

### Introduction-Explanation of the Project

Hello to everyone, welcome and thank you for agreeing to be part of our focus group today.

First of all, let me introduce our team: I'm (name of facilitator) and this is (name of co-facilitator). We're working on this research project with the Fraser Health Authority, the University British Columbia and Genesis Family Empowerment Society. Let's take a minute to go around the circle so that each of you can tell us your name.

Today we want to discuss a group of health services called clinical prevention services. They are activities that you do with your health care provider such as immunization, screening, preventative medication and lifestyle counselling.

Clinical prevention includes 2 types of activities

- 1) Activities that prevent illness before it begins. An example of this is getting your flu shot.
- 2) Activities that help us find illness earlier so that it is more treatable and does less harm to us. An example of this would be colon cancer screening.

The clinical prevention topics that we will be talking about today are (insert topic names here)

1  
2  
3  
4  
5  
6  
7  
8  
9  
10  
11  
12  
13  
14  
15  
16  
17  
18  
19  
20  
21  
22  
23  
24  
25  
26  
27  
28  
29  
30  
31  
32  
33  
34  
35  
36  
37  
38  
39  
40  
41  
42  
43  
44  
45  
46  
47  
48  
49  
50  
51  
52  
53  
54  
55  
56  
57  
58  
59  
60

Research shows that South Asian people are less likely to use clinical prevention services. We want you to help us learn about why some people may not be using these services. The valuable comments and suggestions you provide today will help us learn more about how we can share information about these services and make the services work better for the South Asian community and easier to use.

## Ice Breaker

Before we get started we'd like to learn a little more about you. We really appreciate the time that you're spending with us to share your thoughts and would like to get to know you better by hearing about what you would be doing instead if you weren't here. I'll go first; if I wasn't here today I would be ...

What did you give up to be here today?

## Directions

I will facilitate our discussion. That means a few things

- I will ask questions to the group.
- I won't be doing much talking, but may ask you to explain more or to give an example.
- I will also try to make sure that everyone has a chance to share their ideas and make sure that we have time to discuss all of the questions.

There are no right or wrong answers to the questions we're asking. Each person's opinions are important and we want to hear them.

So, please speak up, whether you agree or disagree with what's being said, and let us know what you think.

Before we start I want to tell you a few things about focus groups:

Sometimes people talk about personal issues during these discussions. Before we begin, I would like everyone to agree that once we leave this group, we will NOT talk about the personal issues that others share with anyone else. Can I see a nod from everyone showing me that you agree with this ground rule? (If anyone is not willing to give their consent to confidentiality, they may be excused from the group.)

We will record the focus group on this recorder because we want to get everything that you say, and we can't write fast enough to get it all down. Only the research team will use this recording. The information in the recording will not be shared in any way that could identify you.

It is important that we speak one at a time, so that we have a good quality recording. So, now that you know what our process is, is everyone OK with being recorded?

1  
2  
3  
4  
5 We plan to be finished with our discussion by STATE END TIME. After our discussion, you will receive a  
6 gift card as our thank-you to you for participating in our research study.  
7

8  
9 The restrooms are located \_\_\_\_\_. One last thing, please turn your cell phones off or to silent  
10 mode so that we can begin our discussion. Thanks.  
11

12 We are going to have a discussion about 2 or 3 stories about clinical prevention. The stories are not  
13 about real people. They are meant to get you thinking about the topic and how it might relate to  
14 people's lives. (*Facilitator Note: Proceed to the clinical prevention topics assigned to this session and*  
15 *select the scenarios that are appropriate to the age and gender of the group*)  
16  
17  
18

## 19 Dialogue of Topics to Cover

### 20 *Smoking*

21  
22  
23 More than 175,000 people living in the Fraser Health area smoke. 1 in 2 people who smoke will die from  
24 a smoking-related disease. Smoking causes: cancer, lung disease, heart disease and stroke. For people  
25 who smoke quitting smoking is the best thing they can do for their health and the health of others  
26 around them.  
27

#### 28 *Women*

29  
30  
31 *Sabita is a mother with three children ages 6, 8 and 11 years. She immigrated to Canada 3 years ago*  
32 *with her husband and children. After the children go to bed Sabita tries to find time to sit with her*  
33 *husband and discuss the day. Sabita's husband smokes cigarettes and says that they help him to relax at*  
34 *the end of a long day. Sometimes he offers a cigarette to Sabita when they are sitting together and*  
35 *lately she has been accepting them. Now Sabita sometimes wishes that she could have a cigarette at*  
36 *other stressful moments. The other day Sabita's 11 year old son came home from school talking about*  
37 *how he had learned about tobacco and how it can harm your health. Sabita wondered about whether*  
38 *smoking was impacting on her health and whether she should try to quit. In the end, she decided not to*  
39 *talk to her doctor about it.*  
40  
41  
42

#### 43 *Men*

44  
45  
46 *Gurdial is 67 years old and recently retired from a security job. His adult son lives in another city with his*  
47 *family and his wife has gone to visit them for 3 months. Gurdial likes to smoke and feels that it relaxes*  
48 *him. Since his wife has been away, he has noticed that he has been smoking more often. The other day*  
49 *Gurdial was listening to a radio show and he learned about tobacco and how it can harm your health.*  
50 *He has been thinking about it but he is not sure that he wants to talk to his doctor about his smoking.*  
51  
52

53 What do you think that (insert name) might have been thinking or feeling when he/she thought about  
54 quitting smoking?  
55

56  
57 Probe: What are some reasons that they would want to quit?  
58  
59  
60

1  
2  
3 Probe: Are there reasons they would think they do not **need** to quit?  
4

5 Probe: Are there reasons that they would not **want** to quit?  
6

7 Why do you think they might find it difficult to talk to their health care provider about quitting smoking?  
8

9 What advice would you give (name) that might make it easier for them to get help to quit smoking?  
10

11 Where might someone like (name) look or who would they ask if they wanted to learn more about  
12 quitting smoking?  
13

14  
15 Probe: {If media sources (e.g. TV, Radio, Newspapers, Websites, Social Media) are mentioned}

16 Which station/site/paper would (name) go to first for information?  
17

18  
19 What could we change about how services are offered to make it easier for people like (name) to get  
20 help with quitting smoking?  
21

22 Probe: Right now people have a few choices if they want help with quitting smoking. They can:  
23

- 24 1. Call 811 for information on the BC Smoking Cessation program and ask about free
- 25 nicotine replacement medications and community resources to help them quit smoking
- 26 2. Ask their doctor or nurse practitioner for help
- 27 3. Visit [www.quitnow.ca](http://www.quitnow.ca) or call them to get personalized help on planning to quit smoking
- 28
- 29
- 30

31 Do you think these services would be helpful for (name)?  
32

33 How could we change these services to make them easier for (name) to use?  
34

35 What other services could we add that would make it easier for (name) to quit smoking?  
36

### 37 *Alcohol*

38 Too much alcohol can hurt your health. Consuming large amounts of alcohol can: increase risk of liver,  
39 pancreas and mouth cancers, change the way medications work, raise blood pressure and affect the  
40 heart. If people choose to drink, they are advised to limit themselves to low risk drinking levels. For  
41 women, this is no more than 2 standard drinks/day or 10drinks/week. For men, this is no more than 3  
42 standard drinks/day or 15 drinks/week.  
43

### 44 *Women*

45  
46  
47  
48  
49 *Sabita is a mother with three children ages 6, 8 and 11 years. She immigrated to Canada 3 years ago*  
50 *with her husband and children. Once a month, Sabita gets together with a group of her friends. When*  
51 *they're together the women like to chat about their lives and often they will have up to four or five*  
52 *glasses of wine over the course of an afternoon. The other day Sabita's 11 year old came home from*  
53 *school talking about how he had learned about alcohol and how it can harm your health. Sabita*  
54 *wondered about whether drinking alcohol was affecting her health and whether she should try to drink*  
55 *less alcohol. In the end, she decided not to talk to her doctor about it.*  
56  
57  
58  
59  
60

**Men**

*Jatinder is a 50 year old Engineer from India. He immigrated to Canada 2 years ago with his wife and kids. Each evening, he likes to have a few drinks and says that it helps to relax him at the end of the day. He recently heard on the radio that drinking alcohol can have a negative impact on health and sometimes wonders whether he should try to cut back. In the end, Jatinder decided not to talk to his doctor about it.*

What do you think that (insert name) might have been thinking or feeling when they heard about how alcohol affects health?

Why do you think they might find it difficult to talk to their health care provider about alcohol and health?

What advice would you give (name) that might make it easier for them to get advice on alcohol and health?

Where might someone like (name) look or who would they ask if they wanted to learn more about alcohol and health?

Probe: {If media sources (e.g. TV, Radio, Newspapers, Websites, Social Media) are mentioned}  
Which station/site/paper would (name) go to first for information?

What could we change about how services are offered to make it easier for people like (name) to discuss their alcohol use and how it impacts on health?

Probe: Right now people have a few choices if they want to talk about alcohol and their health.  
They can:

1. Call 811 or the Alcohol and Drug Referral Information line
2. Talk to their doctor or nurse practitioner
3. Visit the Here to Help website  
(<http://heretohelp.bc.ca/sites/default/files/images/alcohol.pdf>)

Do you think these services would be helpful for (name)?

How could we change these services to make them easier for (name) to use?

What other services could we add that would make it easier for (name) to learn about alcohol and their health?

**Flu Shots**

Over the course of a normal flu season one in ten adults and one in three children will come down with the flu. 2,000 to 8,000 people will die from it. Some people are more likely to experience serious

infections and can get a free flu shot. Getting the flu shot is the best way to protect you from the flu. Getting the flu shot also protects your friends and family by reducing the spread of the virus.

### Women

*Surinder is 40 years old and came to Canada 2 years ago with her husband and children. Her husband works as a laborer in the construction industry. Surinder has 4 children and the youngest two are not yet in school. Surinder stays home with her children but also provides childcare to 3 other young children in order to have more money for her family. Surinder was at the pharmacy the other day and saw a poster saying that child care providers could get the flu shot for free. Surinder thought about asking the pharmacist about the flu shot but decided to wait.*

### Men

*Balwant, age 75, takes great pride in his health. He was a famous college wrestler and kabaddi player and continues to coach youth in these sports. Last year, he contracted the flu and was unable to do his regular activities for several months. This year he thought about getting a flu shot but decided he was well enough and did not get the flu shot.*

What do you think that (insert name) might have been thinking or feeling when they thought about getting the flu shot?

Why do you think they might not talk to their health care provider about getting the flu shot?

What advice would you give (name) that might make it easier for them to get their flu shot?

Where might someone like (name) look or who would they ask if they wanted to learn more about the flu shot?

Probe: {If media sources (e.g. TV, Radio, Newspapers, Websites, Social Media) are mentioned}  
Which station/site/paper would (name) go to first for information?

What could we change about how services are offered to make it easier for people like (name) to get the flu shot?

Probe: Right now people have a few choices if they're thinking of getting a flu shot. They can:

1. Call 811 to find out about getting a flu shot at a local pharmacy or health unit
2. Ask their doctor or nurse practitioner for the flu shot
3. Visit [www.fraserhealth.ca](http://www.fraserhealth.ca) and search "flu shot" to find out where they can get the flu shot

Do you think these services would be helpful for (name)?

How could we change these services to make them easier for (name) to use?

What other services could we add that would make it easier for (name) to get a flu shot?

### *Pneumococcal Vaccine*

Pneumococcus is a bacterium that can cause serious infections, including pneumonia, meningitis and blood infections. Pneumococcal infection can be spread through coughing, sneezing or sharing food or drinks. Seniors over 65 years old, people living in a residential care or other group facility and people living with a chronic health issue like COPD, asthma or diabetes are at greater risk of serious illness and can get the pneumococcal shot for free.

#### *Women*

*Simar is 74 years old and living at home with her 2 sons and daughter-in-laws. Simar's sons and daughters in law work long hours so she takes pride in preparing meals for the family. However, last winter Simar needed to go to the hospital for pneumonia and it took a long time for her to recover. The meals in the house were not the same for some time. This year, one of her sons heard that people over 65 can get a free shot that helps prevent pneumonia and told her about it. However, she's not sure that she wants to get one.*

#### *Men*

*Jagdev is 74 years old and living at home with his wife, 2 sons and daughter-in-laws. Jagdev has been to the doctor 3 times for pneumonia and it seems to occur at the same time every year. Each time it takes a long time to recover and he misses out on activities with his family and friends. One of his sons heard that people over 65 can get a free shot that helps prevent pneumonia and told him about it but Jagdev does not want to go and get it.*

What do you think that (insert name) might have been thinking or feeling when they heard about getting the pneumococcal shot?

Why do you think they might find it difficult to talk to their health care provider about getting the pneumococcal shot?

What advice would you give (name) that might make it easier for them to get their pneumococcal shot?

Where might someone like (name) look or who would they ask if they wanted to learn more about the pneumococcal shot?

Probe: {If media sources (e.g. TV, Radio, Newspapers, Websites, Social Media) are mentioned}  
Which station/site/paper would (name) go to first for information?

What could we change about how services are offered to make it easier for people like (name) to get the pneumococcal shot?

Probe: Right now people have a few choices if they're thinking of getting a pneumococcal shot.  
They can:

1. Call 811 to find out about getting the shot at a local pharmacy or health unit
2. Ask their doctor or nurse practitioner about getting a pneumococcal shot



- 1  
2  
3 3. Visit [www.healthlinkbc.ca](http://www.healthlinkbc.ca) and search “pneumococcal” to learn more  
4  
5

6 Do you think these services would be helpful for (name)?  
7

8 How could we change these services to make them easier for (name) to use?  
9

10 What other services could we add that would make it easier for (name) to get a pneumococcal  
11 shot?  
12  
13

### 14 *Tetanus Shots*

15 Tetanus is a serious infection that can cause severe muscle spasms and seizures. Tetanus is caused by  
16 bacteria that live in the soil. You can become infected through a cut or wound. The best way to prevent  
17 Tetanus is to get a tetanus shot. Tetanus shots need to be updated every 10 years.  
18  
19

### 20 *Women*

21 *Kiran is 45 years old. One day one of her sons came back from school and said that his whole class got a*  
22 *tetanus shot that day. Kiran remembers signing a consent form but didn't really think much of it. Her*  
23 *son tells her that everyone should get a tetanus shot every 10 years. Kiran doesn't remember the last*  
24 *time she had a tetanus shot but does not try to get one.*  
25  
26  
27  
28

29 What do you think that (insert name) might have been thinking or feeling when they heard about  
30 getting the tetanus shot?  
31

32 Why do you think they might find it difficult to talk to their health care provider about getting the  
33 tetanus shot?  
34

35 What advice would you give (name) that might make it easier for them to get their tetanus shot?  
36  
37

38 Where might someone like (name) look or who would they ask if they wanted to learn more about the  
39 tetanus shot?  
40  
41

42 Probe: {If media sources (e.g. TV, Radio, Newspapers, Websites, Social Media) are mentioned}  
43 Which station/site/paper would (name) go to first for information?  
44

45 What could we change about how services are offered to make it easier for people like (name) to get the  
46 tetanus shot?  
47  
48

49 Probe: Right now people have a few choices if they're thinking of getting a tetanus shot. They  
50 can:  
51

- 52  
53 1. Call 811 to find out about getting the shot at a local pharmacy or health unit  
54 2. Ask their doctor or nurse practitioner about getting a tetanus shot  
55 3. Visit [www.healthlinkbc.ca](http://www.healthlinkbc.ca) and search “tetanus” to learn more  
56  
57  
58  
59  
60

1  
2  
3 Do you think these services would be helpful for (name)?

4  
5 How could we change these services to make them easier for (name) to use?

6  
7 What other services could we add that would make it easier for (name) to get a tetanus shot?

### 8 9 10 *Blood Pressure Screening*

11  
12 Everyone over the age of 18 should get their blood pressure checked each year. It is normal for your  
13 blood pressure to go up and down but if it stays too high it can cause health problems. For example,  
14 high blood pressure can cause heart attacks, strokes, blindness, kidney disease and amputations. High  
15 blood pressure is often called a 'silent killer' because it has no warning signs or symptoms – it affects  
16 one in five Canadians. By knowing and controlling your blood pressure, you can cut your risk of stroke by  
17 up to 40 percent and heart attack by up to 25 percent.

#### 18 19 20 21 *Women*

22  
23 *Gurleen is 59 years old. She's a cleaner at the hospital and works long shifts. She's known in her*  
24 *community as an excellent cook loves feeding her family a wide variety of rich and tasty food. One day*  
25 *she sees a poster at the hospital saying that all adults should get their blood pressure checked every*  
26 *year. Gurleen wonders whether she should find a way to get her blood pressure checked but ends up not*  
27 *doing it.*

#### 28 29 30 31 *Men*

32  
33 *Avtar is 71 and generally feels that he is in good health. He used to go for regular check-ups with his*  
34 *doctor. Now his family has moved to a new community and he no longer sees his doctor regularly. Avtar*  
35 *hears on the radio that all adults should get their blood pressure checked every year. He wonders*  
36 *whether he should find a way to get her blood pressure checked but ends up not doing it.*

37  
38 What do you think that (insert name) might have been thinking or feeling when they heard about blood  
39 pressure screening?

40  
41 Why do you think they might find it difficult to talk to their health care provider about getting their  
42 blood pressure checked?

43  
44 What advice would you give (name) that might make it easier for them to get their blood pressure  
45 checked?

46  
47 Where might someone like (name) look or who would they ask if they wanted to learn more about  
48 blood pressure?

49  
50 Probe: {If media sources (e.g. TV, Radio, Newspapers, Websites, Social Media) are mentioned}  
51 Which station/site/paper would (name) go to first for information?  
52  
53  
54  
55  
56  
57  
58  
59  
60

1  
2  
3 What could we change about how services are offered to make it easier for people like (name) to get  
4 their blood pressure checked?  
5

6  
7 Probe: Right now people have a few choices if they're thinking of checking their blood pressure.  
8 They can:  
9

- 10  
11  
12  
13  
14  
15  
16  
17
1. Call 811 to ask about hypertension
  2. Ask their doctor or nurse practitioner about diet, exercise, and medications to control their blood pressure
  3. Many pharmacies also offer free blood pressure testing
  4. Visit [www.heartandstroke.bc.ca](http://www.heartandstroke.bc.ca) and search "hypertension" to learn more

18 Do you think these services would be helpful for (name)?

19 How could we change these services to make them easier for (name) to use?

20  
21 What other services could we add that would make it easier for (name) to get their blood  
22 pressure checked?  
23

### 24 *Cholesterol Screening*

25  
26 Too much bad cholesterol builds up and clogs arteries. It increases your risk for heart attacks and  
27 strokes. Many things cause high cholesterol such as: being overweight, being inactive, unhealthy eating  
28 and a family history of high cholesterol. Women over 50 and men over 40 should talk to their health  
29 care providers about cholesterol testing.  
30

#### 31 *Women*

32  
33  
34 *Preet is a 65 year old woman who is generally in good health. She recently found out that her cousin has*  
35 *suffered from a stroke. She also heard that her cousin had high cholesterol and that this increased her*  
36 *risk of having a stroke. Her cousin's family is saying that everyone in the family should get their*  
37 *cholesterol checked to make sure aren't at risk for a stroke too. Since she found out about her cousin,*  
38 *Preet has been postponing her annual visit to her family doctor. When the doctor's office asks if she*  
39 *would like to reschedule she says she is too busy.*  
40  
41  
42

#### 43 *Men*

44  
45  
46 *Manvir is a 40 years old and lives with his mother, his wife and his 2 sons. Manvir takes good care of his*  
47 *health by eating well and walking with his family each weekend. Manvir does not smoke or drink*  
48 *alcohol. Manvir has not had any problems with his health and has not seen his doctor in the past 10*  
49 *years. Last month, one of his sons was learning about heart health at school and came home with a*  
50 *pamphlet that recommended cholesterol screening for men starting at age 40 but Manvir has not*  
51 *scheduled an appointment with his doctor.*  
52  
53

54 What do you think that (insert name) might have been thinking or feeling when they heard about  
55 cholesterol screening?  
56  
57  
58  
59  
60

Why do you think they might find it difficult to talk to their health care provider about getting their cholesterol checked?

What advice would you give (name) that might make it easier for them to get their cholesterol checked?

Where might someone like (name) look or who would they ask if they wanted to learn more about cholesterol?

Probe: {If media sources (e.g. TV, Radio, Newspapers, Websites, Social Media) are mentioned}  
Which station/site/paper would (name) go to first for information?

What could we change about how services are offered to make it easier for people like (name) to get their cholesterol checked?

Probe: Right now people have a few choices if they're thinking of getting their cholesterol checked. They can:

1. Call 811 to speak to a nurse or dietitian
2. Ask their doctor or nurse practitioner about lipid (cholesterol) testing
3. Visit [www.heartandstroke.bc.ca](http://www.heartandstroke.bc.ca) and search "high blood cholesterol" to learn more

Do you think these services would be helpful for (name)?

How could we change these services to make them easier for (name) to use?

What other services could we add that would make it easier for (name) to get their cholesterol checked?

### *Colorectal Cancer Screening*

Colon cancer can develop from small growths of tissues in the colon and rectum. If undiscovered and untreated, these growths can become cancer. Colorectal cancer is the third most common cancer in Canada and the second leading cause of cancer death in British Columbia. Fortunately, if detected at its earliest stage, the chance of survival is over 90%. A Stool (poop) test can check for an early sign of colorectal cancer. Everyone 50 to 74 years old should have a check for colon cancer.

#### *Women*

*Guneet is a busy professional who balances work with family responsibilities but always finds time to go for annual check-ups with her doctor. Her doctor said that now that she has turned 50, she should start getting colorectal cancer screening. Guneet asked what she has to do and it turns out she has to give a stool sample. She takes the pamphlet and leaves but does not get the screening done.*

#### *Men*

*Arun is a retired accountant and a very busy member of his community. He goes for annual check-ups with his doctor. His old doctor has retired and when he went to see his new doctor they said that he*

1  
2  
3 *should get colorectal cancer screening done. Arun asked what he has to do and it turns out he has to*  
4 *give a stool sample. He takes the pamphlet and leaves but does not get the screening done.*  
5  
6

7 What do you think that (insert name) might have been thinking or feeling when they heard about colon  
8 cancer screening?  
9

10 Why do you think they might find it difficult to talk to their health care provider about getting colon  
11 cancer screening?  
12

13 What advice would you give (name) that might make it easier for them to get colon cancer screening?  
14  
15

16 Where might someone like (name) look or who would they ask if they wanted to learn more about colon  
17 cancer screening?  
18

19 Probe: {If media sources (e.g. TV, Radio, Newspapers, Websites, Social Media) are mentioned}  
20 Which station/site/paper would (name) go to first for information?  
21  
22

23 What could we change about how services are offered to make it easier for people like (name) to get  
24 colon cancer screening?  
25

26 Probe: Right now people have a few choices if they're thinking of getting their screened for  
27 colon cancer. They can:  
28

- 29 1. Call 811 to get advice about colorectal cancer
- 30 2. Ask their doctor or nurse practitioner about screening for colorectal cancer
- 31 3. Visit [www.bcguidelines.ca/pdf/col\\_pat.pdf](http://www.bcguidelines.ca/pdf/col_pat.pdf) to learn more

32 Do you think these services would be helpful for (name)?  
33  
34

35 How could we change these services to make them easier for (name) to use?  
36  
37

38 What other services could we add that would make it easier for (name) to get screened for  
39 colon cancer?  
40  
41

## 42 *Cervical Cancer Screening*

43 Cervical cancer happens when abnormal cells on the cervix grow out of control. Most cervical cancer is  
44 caused by a virus called Human Papillomavirus (HPV). You can get HPV by having sexual contact with  
45 someone who has it. Pap tests check for early signs of cervical cancer. Regular Pap tests help to improve  
46 the chance that changes in the cervix are caught early when they are more treatable and can save lives.  
47  
48

### 49 *Women*

50  
51 *Surinder is 54 years old. She has never got a Pap test done and moved to Canada 2 years ago. Surinder's*  
52 *doctor is a male doctor who wants her to get a pap test done. The doctor gave her a brochure on pap*  
53 *tests but she has not read it and has not scheduled a pap test with her doctor.*  
54  
55

56 What do you think that Surinder might have been thinking or feeling when her doctor told her about  
57 getting a pap test?  
58  
59  
60

1  
2  
3 Why do you think she might find it difficult to talk to their health care provider about getting a pap test?

4  
5 What advice would you give Surinder that might make it easier for her to get a pap test?

6  
7  
8 Where might someone like Surinder look or who would they ask if they wanted to learn more about pap  
9 tests?

10  
11 Probe: {If media sources (e.g. TV, Radio, Newspapers, Websites, Social Media) are mentioned}  
12 Which station/site/paper would (name) go to first for information?

13  
14  
15 What could we change about how services are offered to make it easier for people like Surinder to get  
16 cervical cancer screening?

17  
18 Probe: Right now people have a few choices if they're thinking of getting a Pap test. They can:

- 19  
20  
21 1. Call 811 to speak to find out ways to prevent cervical cancer  
22 2. Ask their doctor or nurse practitioner for a Pap test  
23 3. Visit [www.bccancer.bc.ca](http://www.bccancer.bc.ca) and search "pap" to learn more

24 Do you think these services would be helpful for Surinder?

25  
26 How could we change these services to make them easier for Surinder to use?

27  
28 What other services could we add that would make it easier for Surinder to get a Pap test?

### 30 31 *Breast Cancer Screening*

32 Breast Cancer is the most common cancer in women in B.C. 1 in 9 women will get breast cancer in her  
33 lifetime. Mammograms are x-rays of the breasts. They look for early signs of breast cancer to help find  
34 it while it's treatable. Women over 50 should talk to their health care provider about when they should  
35 start or have their next mammogram.  
36

#### 37 38 *Women 40-64*

39  
40  
41 *At 40, Permjit was a healthy mother of 3 young children. She balanced working with raising 2 active*  
42 *young boys and a daughter and caring for her in-laws and extended family. Never did she think she*  
43 *would have breast cancer. One day she heard a story on the radio about a woman her age who had*  
44 *been diagnosed with breast cancer. The woman on the radio said that when she first heard she had*  
45 *cancer all she could think about was what would happen to her little girl. She also said that every*  
46 *woman should talk to their doctor about having a mammogram. Permjit wondered whether she should*  
47 *get screened but somehow she didn't get around to booking an appointment with her doctor.*  
48

49  
50  
51 What do you think that (insert name) might have been thinking or feeling when they heard about breast  
52 cancer screening?

53  
54 Why do you think they might find it difficult to talk to their health care provider about getting breast  
55 cancer screening?  
56

57  
58 What advice would you give (name) that might make it easier for them to get breast cancer screening?  
59  
60

1  
2  
3 Where might someone like (name) look or who would they ask if they wanted to learn more about  
4 breast cancer screening?  
5

6  
7 Probe: {If media sources (e.g. TV, Radio, Newspapers, Websites, Social Media) are mentioned}  
8 Which station/site/paper would (name) go to first for information?  
9

10 What could we change about how services are offered to make it easier for people like (name) to get  
11 breast cancer screening?  
12

13  
14 Probe: Right now people have a few choices if they're thinking of getting a mammogram. They  
15 can:  
16

- 17 1. Call 811 for advice about mammograms
- 18 2. Book their own screening mammogram by calling 1-800-663-9203
- 19 3. Ask their doctor or nurse practitioner about free screening mammogram every 2-3 years
- 20 4. Visit [www.smpbc.ca](http://www.smpbc.ca) to learn more

21 Do you think these services would be helpful for (name)?  
22

23  
24 How could we change these services to make them easier for (name) to use?  
25

26 What other services could we add that would make it easier for (name) to get a mammogram?  
27  
28

29 Closing Q & A  
30  
31  
32  
33  
34  
35  
36  
37  
38  
39  
40  
41  
42  
43  
44  
45  
46  
47  
48  
49  
50  
51  
52  
53  
54  
55  
56  
57  
58  
59  
60
